# Supplementary material for: p300 suppresses the transition of myelodysplastic syndromes to acute myeloid leukemia
Source: JCI journal article supplement (doi:10.1172/jci.insight.138478), 2021-10-07
Supplement: sd1 [file 1]

You are being redirected.
